# Supplementary material for: Amyloidogenic peptide oligomer accumulation in autophagy-deficient β cells induces diabetes
Source: JCI journal article supplement (doi:10.1172/jci69625), 2014-07-17
Supplement: sd1 [file 1]

**A**

DAPI FSB

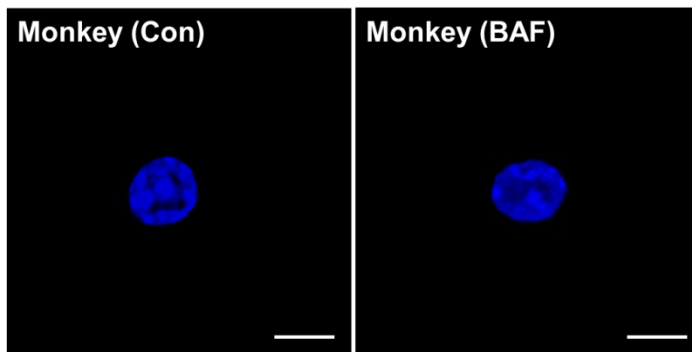

**Supplemental Figure 1**

No accumulation of amyloid in primary monkey islet cells in vitro. FSB staining revealed no accumulation of amyloid in the cytoplasm after incubation with 100 nM bafilomycin for 24 h which induces IAPP oligomer accumulation (see Figure 4A). (scale bar, 5  $\mu$ m)

**A**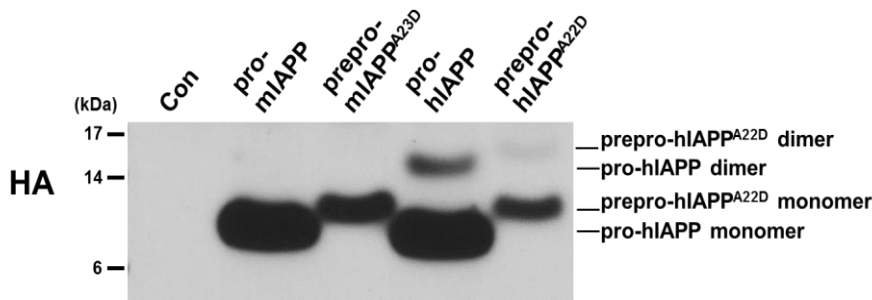**Supplemental Figure 2**

Different sizes of uncleaved prepro-hIAPP monomer and pro-hIAPP dimer. Mutation causing impaired cleavage of 'pre' sequence from prepro-IAPP (28) was introduced by the site-directed mutagenesis of *prepro-mIAPP-HA* (A23D) and *prepro-hIAPP-HA* (A22D). After transfection of INS-1 cells with the wild-type and mutant *prepro-mIAPP-HA* or *prepro-hIAPP-HA*, Western blot analysis was conducted using anti-HA Ab. The size of uncleaved prepro-hIAPP monomer was apparently smaller than that of pro-hIAPP 'dimer', indicating that the 'dimer' band is not due to impaired cleavage of 'pre' sequence from prepro-hIAPP.

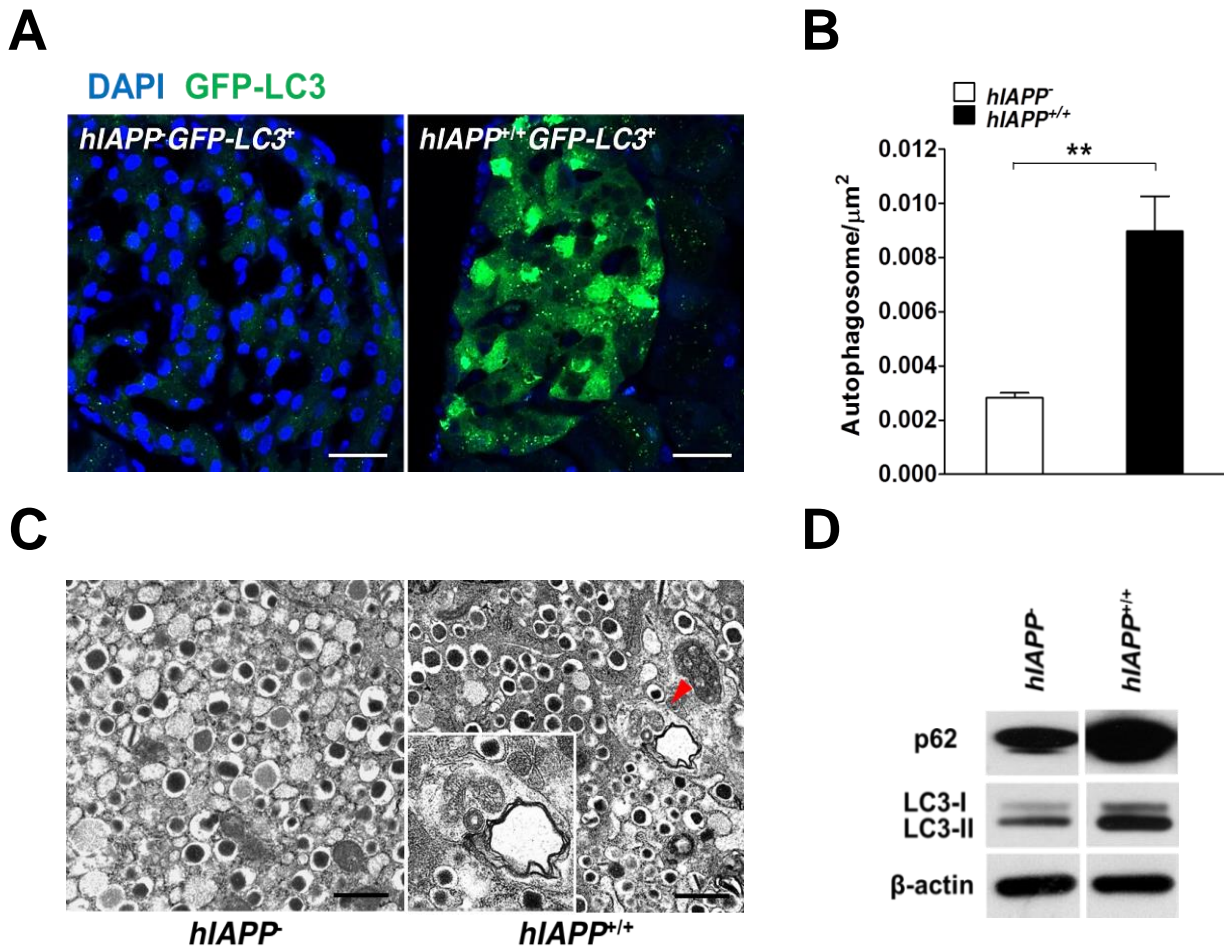

### Supplemental Figure 3

Effect of *hiAPP* on autophagy. **(A)** GFP-LC3 puncta representing autophagosomes in islets of 12-wk-old male *hiAPP*<sup>+/+</sup>GFP-LC3<sup>+</sup> mice. (scale bar, 50  $\mu\text{m}$ ) **(B)** The number of autophagosomes in islets of 8 ~ 12-wk-old male *hiAPP*<sup>+/+</sup> and control mice was counted by EM as described in the Methods ( $n = 3$  each). **(C)** Representative EM pictures showing a typical autophagosome in islets of *hiAPP*<sup>+/+</sup> mice. Inset is a magnified view of an autophagosome indicated by arrow head. (scale bar, 1  $\mu\text{m}$ ) **(D)** Western blot analysis of pancreatic islets from *hiAPP*<sup>+/+</sup> mice using anti-LC3 or -p62 Ab, indicating increased steady-state autophagy level and p62 accumulation due to autophagy blockade. The lanes were run on the same gel but were noncontiguous. (\*\*,  $P < 0.01$ )

**A**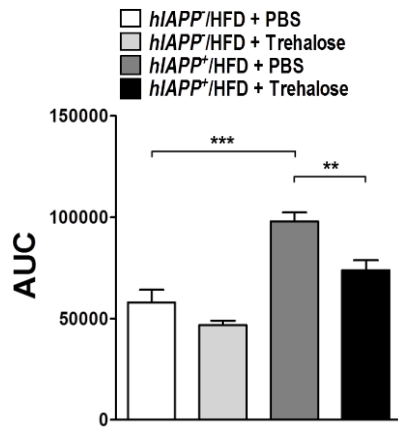**B**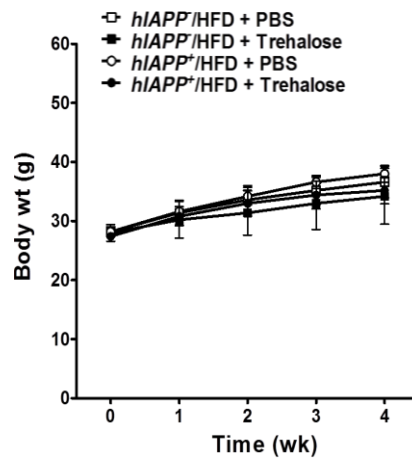**Supplemental Figure 4**

Changes of AUC of IPGTT and body wt during trehalose administration. **(A)** AUC was calculated from data of Figure 6D ( $n = 5$ ). **(B)** Body wt was monitored during trehalose administration to *hIAPP*<sup>+</sup> mice on HFD ( $n = 5$ ). Food intake was also not affected by trehalose administration for 4 wk (data not shown).
